# Supplementary material for: Ingested Nitrate and Breast Cancer in the Spanish Multicase-Control Study on Cancer (MCC-Spain)
Source: Environ Health Perspect. 2016 Mar 4;124(7):1042–9. doi: 10.1289/ehp.1510334 (PMC4937871; doi:10.1289/ehp.1510334)
Supplement: (598 KB) PDF [file ehp.1510334.s001.acco.pdf]

**Note to readers with disabilities:** *EHP* strives to ensure that all journal content is accessible to all readers. However, some figures and Supplemental Material published in *EHP* articles may not conform to [508 standards](#) due to the complexity of the information being presented. If you need assistance accessing journal content, please contact [ehp508@niehs.nih.gov](mailto:ehp508@niehs.nih.gov). Our staff will work with you to assess and meet your accessibility needs within 3 working days.

## **Supplemental Material**

### **Ingested Nitrate and Breast Cancer in the Spanish Multicase-Control Study on Cancer (MCC-Spain)**

Nadia Espejo-Herrera, Esther Gracia-Lavedan, Marina Pollan, Nuria Aragonés, Elena Boldo, Beatriz Perez-Gomez, Jone M. Altzibar, Pilar Amiano, Ana Jiménez Zabala, Eva Ardanaz, Marcela Guevara, Antonio J. Molina, Juan Pablo Barrio, Ines Gómez-Acebo, Adonina Tardón, Rosana Peiró, M<sup>a</sup> Dolores Chirlaque, Margarita Palau, Montse Muñoz, Laia Font-Ribera, Gemma Castaño-Vinyals, Manolis Kogevinas, and Cristina M. Villanueva

## **Table of Contents**

**Table S1.** General characteristics of analyzed compared to excluded population

**Table S2.** Average waterborne ingested nitrate in different exposure periods and breast cancer association (OR and 95%CI) by menopausal status

**Table S3.** Interaction of waterborne ingested nitrate with relevant covariables and breast cancer association (OR and 95%CI) among premenopausal women

**Table S4.** Waterborne ingested nitrate and breast cancer association (OR and 95%CI) stratified by other covariables among pre and postmenopausal women

**Table S5.** Breast cancer association (OR and 95%CI) with dietary ingested nitrate (mg/day) from different sources by menopausal status

**Figure S1.** Exposure-response relationship between waterborne nitrate intake (mg/day) from age 18 to 2 years before the interview and breast cancer association. Generalized additive models (GAMs) by study area

**Table S1. General characteristics of analyzed (N=2765) compared to excluded (N=642) population**

| <b>Characteristic</b>                    |                  | <b>Excluded</b> | <b>Analyzed</b> | <b><i>p value</i></b> |
|------------------------------------------|------------------|-----------------|-----------------|-----------------------|
|                                          |                  | <b>n (%)</b>    | <b>n (%)</b>    |                       |
| <b>Controls</b>                          |                  | 302 (47.0)      | 1,520 (55.0)    |                       |
| <b>Cases</b>                             |                  | 340 (53.0)      | 1,245 (45.0)    | <0.001                |
| <b>Age</b>                               |                  |                 |                 |                       |
|                                          | Mean (SD)        | 55.8 (14.2)     | 58.4(12.7)      | <0.001*               |
|                                          | Range            | 24-85           | 23-85           |                       |
| <b>Education</b>                         |                  |                 |                 |                       |
|                                          | <Primary school  | 110 (17.1)      | 450 (16.3)      | 0.046                 |
|                                          | Primary school   | 176 (27.4)      | 899 (32.5)      |                       |
|                                          | Secondary school | 206 (32.1)      | 871 (31.5)      |                       |
|                                          | University       | 150 (23.4)      | 545 (19.7)      |                       |
| <b>Body mass index</b>                   |                  |                 |                 |                       |
|                                          | <18.5            | 12 (1.9)        | 54 (2.0)        | 0.974                 |
|                                          | 18.5-24.9        | 294 (45.8)      | 1,272 (46.0)    |                       |
|                                          | 25-29.9          | 212 (33.0)      | 940 (34.0)      |                       |
|                                          | ≥30              | 109 (17.0)      | 499 (18.0)      |                       |
|                                          | Missing          | 15 (2.3)        | 0 (0.00)        |                       |
| <b>Physical activity</b>                 |                  |                 |                 |                       |
|                                          | Low              | 476 (74.1)      | 1,958 (70.8)    | 0.128                 |
|                                          | Intermediate     | 65 (10.1)       | 356 (12.9)      |                       |
|                                          | High             | 101 (15.7)      | 451 (16.3)      |                       |
| <b>Family history of BC <sup>a</sup></b> |                  |                 |                 |                       |
|                                          | No               | 458 (71.3)      | 2,005 (72.5)    | 0.883                 |
|                                          | Yes              | 154 (24.0)      | 664 (24.0)      |                       |
|                                          | Missing          | 30 (4.7)        | 96 (3.5)        |                       |
| <b>Age at menarche</b>                   |                  |                 |                 |                       |
|                                          | Mean (SD)        | 13(1.6)         | 12.8(1.6)       | 0.040*                |
|                                          | Range            | 8-18            | 7-20            |                       |
| <b>Age at first birth <sup>b</sup></b>   |                  |                 |                 |                       |
|                                          | ≤30 years        | 386 (78.6)      | 1768 (78.6)     | 0.781                 |
|                                          | >30 years        | 97 (19.8)       | 460 (20.5)      |                       |
|                                          | Missing          | 8 (1.6)         | 20 (0.9)        |                       |
| <b>Age at menopause <sup>c</sup></b>     |                  |                 |                 |                       |
|                                          | ≤50 years        | 231 (56.6)      | 1,094 (52.6)    | 0.144                 |
|                                          | >50 years        | 121 (29.7)      | 685 (32.9)      |                       |
|                                          | Missing          | 56 (13.7)       | 303 (14.6)      |                       |
| <b>Menopausal status</b>                 |                  |                 |                 |                       |
|                                          | Premenopausal    | 232 (36.1)      | 679 (24.6)      |                       |

|                                    |                     |             |              |        |
|------------------------------------|---------------------|-------------|--------------|--------|
|                                    | Postmenopausal      | 410 (63.9)  | 2086 (75.4)  | <0.001 |
| <b>Oral contraceptives use</b>     |                     |             |              |        |
|                                    | Never               | 330 (51.4)  | 1,450 (52.4) |        |
|                                    | Ever                | 306 (47.7)  | 1,311 (47.4) |        |
|                                    | Missing             | 6 (0.9)     | 4 (0.1)      | 0.774  |
| <b>Parity</b>                      |                     |             |              |        |
|                                    | Nulliparity         | 151 (23.52) | 517 (18.70)  |        |
|                                    | 1 delivery          | 118 (18.38) | 468 (16.93)  |        |
|                                    | 2 delivery          | 210 (32.71) | 1130 (40.87) |        |
|                                    | >2 deliveries       | 157 (24.45) | 642 (23.22)  |        |
|                                    | Missing             | 6 (0.9)     | 8 (0.3)      | 0.001  |
| <b>Energy intake</b>               |                     |             |              |        |
|                                    | ≤1479 kcal/day      | 145 (22.6)  | 735 (26.6)   |        |
|                                    | >1479-1894 kcal/day | 177 (27.6)  | 809 (29.3)   |        |
|                                    | >1894 kcal/day      | 200 (31.2)  | 880 (31.8)   |        |
|                                    | Missing             | 120 (18.7)  | 341 (12.3)   | 0.487  |
| <b>Red meat intake</b>             |                     |             |              |        |
|                                    | <16 g/day           | 183 (28.5)  | 758 (27.4)   |        |
|                                    | >16-29 g/day        | 153 (23.8)  | 793 (28.7)   |        |
|                                    | >29 g/day           | 186 (29.0)  | 873 (31.6)   |        |
|                                    | Missing             | 120 (18.7)  | 341 (12.3)   | 0.174  |
| <b>Processed meat</b>              |                     |             |              |        |
|                                    | <5.2 g/day          | 177 (27.6)  | 740 (26.8)   |        |
|                                    | >5.2-13.4 g/day     | 173 (27.0)  | 807 (29.2)   |        |
|                                    | >13.4 g/day         | 172 (26.8)  | 877 (31.7)   |        |
|                                    | Missing             | 120 (18.7)  | 341 (12.3)   | 0.242  |
| <b>Vitamin C intake</b>            |                     |             |              |        |
|                                    | <129 mg/day         | 180 (28.0)  | 843 (30.5)   |        |
|                                    | 129-203 mg/day      | 141 (22.0)  | 764 (27.6)   |        |
|                                    | >203 mg/day         | 201 (31.3)  | 817 (29.6)   |        |
|                                    | Missing             | 120 (18.7)  | 341 (12.3)   | 0.060  |
| <b>Vitamin E intake</b>            |                     |             |              |        |
|                                    | <8.6 mg/day         | 158 (24.6)  | 803 (29.0)   |        |
|                                    | >8.6-12.2 mg/day    | 150 (23.4)  | 801 (29.0)   |        |
|                                    | >12.2 mg/day        | 214 (33.3)  | 820 (29.7)   |        |
|                                    | Missing             | 120 (18.7)  | 341 (12.3)   | 0.007  |
| <b>Waterborne ingested nitrate</b> |                     |             |              |        |
|                                    | <2.6 mg/day         | 146 (22.7)  | 930 (33.6)   |        |
|                                    | ≥2.6-6.0 mg/day     | 167 (26.0)  | 908 (32.8)   |        |
|                                    | >6.0 mg/day         | 186 (29.0)  | 927 (33.5)   |        |
|                                    | Missing             | 143 (22.3)  | 0 (0.00)     | 0.120  |

<sup>a</sup> BC (Breast cancer). <sup>b</sup> Distribution among non-nulliparous women. <sup>c</sup> Distribution only for postmenopausal women. *p*-values for Chi square test in categorical variables and for T test\* in continuous variables.

**Table S2. Average waterborne ingested nitrate in different exposure periods and breast cancer association (OR and 95% CIs) by menopausal status.**

| Exposure periods                                                        | Ingested nitrate   | Cases | Controls | Postmenopausal<br>OR <sup>b</sup> (95%CI) | Ingested nitrate | Cases | Controls | Premenopausal<br>OR <sup>c</sup> (95%CI) |
|-------------------------------------------------------------------------|--------------------|-------|----------|-------------------------------------------|------------------|-------|----------|------------------------------------------|
| <b>Long-term (age 18 years to 2 years before interview)<sup>a</sup></b> |                    |       |          |                                           |                  |       |          |                                          |
|                                                                         | <2.2 mg/day        | 227   | 294      | Ref.                                      | <1.8 mg/day      | 71    | 87       | Ref.                                     |
|                                                                         | ≥2.2-3.8 mg/day    | 229   | 293      | 1.07 (0.83, 1.40)                         | ≥1.8-3.1 mg/day  | 87    | 87       | 1.33 (0.84, 2.11)                        |
|                                                                         | >3.8-9.1 mg/day    | 226   | 293      | 1.07 (0.81, 1.42)                         | >3.1-6.0 mg/day  | 80    | 87       | 1.02 (0.63, 1.65)                        |
|                                                                         | >9.1 mg/day        | 231   | 293      | 1.31 (0.91, 1.91)                         | >6.0 mg/day      | 94    | 86       | 1.27 (0.73, 2.23)                        |
|                                                                         | <i>p for trend</i> |       |          | 0.23                                      |                  |       |          | 0.61                                     |
| <b>Recent (from 15 to 2 years before interview)</b>                     |                    |       |          |                                           |                  |       |          |                                          |
|                                                                         | <2.2 mg/day        | 218   | 290      | Ref.                                      | <2.0 mg/day      | 85    | 87       | Ref.                                     |
|                                                                         | ≥2.2-3.7 mg/day    | 226   | 292      | 1.08 (0.83, 1.40)                         | ≥2.0-3.2 mg/day  | 75    | 86       | 0.97 (0.61, 1.52)                        |
|                                                                         | >3.7-8.5 mg/day    | 227   | 288      | 1.18 (0.89, 1.57)                         | >3.2-6.2 mg/day  | 79    | 86       | 0.80 (0.50, 1.29)                        |
|                                                                         | >8.5 mg/day        | 228   | 289      | 1.30 (0.93, 1.82)                         | >6.2 mg/day      | 90    | 86       | 1.01 (0.60, 1.71)                        |
|                                                                         | <i>p for trend</i> |       |          | 0.11                                      |                  |       |          | 0.81                                     |
| <b>Early adulthood (age 18 to 30 years )</b>                            |                    |       |          |                                           |                  |       |          |                                          |
|                                                                         | <2.2 mg/day        | 220   | 292      | Ref.                                      | <1.7 mg/day      | 78    | 87       | Ref.                                     |
|                                                                         | ≥2.2-4.2 mg/day    | 227   | 271      | 1.16 (0.89, 1.52)                         | ≥1.7-3.0 mg/day  | 80    | 86       | 1.05 (0.66, 1.67)                        |
|                                                                         | >4.2-9.2 mg/day    | 230   | 281      | 1.14 (0.86, 1.52)                         | >3.0-5.6 mg/day  | 71    | 86       | 0.83 (0.51, 1.34)                        |
|                                                                         | >9.2 mg/day        | 209   | 281      | 1.12 (0.78, 1.61)                         | >5.6 mg/day      | 102   | 86       | 1.33 (0.78, 2.27)                        |
|                                                                         | <i>p for trend</i> |       |          | 0.46                                      |                  |       |          | 0.58                                     |

<sup>a</sup> Analysis with alternative waterborne ingested levels, calculated assuming that women with bottled water consumption in recent residences, actually used tap water before the year 2000 and bottled water thereafter. <sup>b</sup> Adjusted for: study area, age, education, body mass index, family history of breast cancer, age at menopause, age at first birth, oral contraceptives use, and energy intake. <sup>c</sup> Age at menopause was excluded from the adjustment for premenopausal women. Trend *p*-values derived from a likelihood ratio test that comparing a model with the categorical nitrate intake variable as an ordinal variable (0, 1, 2) with a model that excluded this variable.

**Table S3. Interaction of waterborne ingested nitrate with relevant covariables and breast cancer association (OR and 95%CI) among premenopausal women <sup>a</sup>**

| <b>Waterborne<br/>Ingested nitrate</b> | <b>Cases</b>          | <b>Controls</b> | <b>OR <sup>b</sup> (95% CI)</b> | <b>Cases</b> | <b>Controls</b> | <b>OR <sup>b</sup> (95% CI)</b> | <b>Interaction<br/><i>p value</i><sup>*</sup></b> |
|----------------------------------------|-----------------------|-----------------|---------------------------------|--------------|-----------------|---------------------------------|---------------------------------------------------|
|                                        | <b>Vitamin C</b>      |                 | <b>&lt;142 mg/day</b>           |              |                 | <b>≥142 mg/day</b>              |                                                   |
| <2.3 mg/day                            | 54                    | 55              | Ref.                            | 45           | 50              | 0.69 (0.38, 1.26)               | 0.71                                              |
| ≥2.3-4.7 mg/day                        | 43                    | 52              | 0.88 (0.49, 1.61)               | 43           | 56              | 0.56 (0.31, 1.02)               |                                                   |
| >4.7 mg/day                            | 51                    | 48              | 0.94 (0.49, 1.83)               | 51           | 48              | 0.84 (0.44, 1.61)               |                                                   |
|                                        | <b>Vitamin E</b>      |                 | <b>&lt;10 mg/day</b>            |              |                 | <b>≥10 mg/day</b>               |                                                   |
| <2.3 mg/day                            | 50                    | 55              | Ref.                            | 49           | 50              | 0.77 (0.41, 1.46)               | 0.75                                              |
| ≥2.3-4.7 mg/day                        | 39                    | 56              | 0.73 (0.40, 1.32)               | 47           | 52              | 0.71 (0.37, 1.38)               |                                                   |
| >4.7 mg/day                            | 44                    | 44              | 1.10 (0.56, 2.15)               | 58           | 52              | 0.78 (0.39, 1.55)               |                                                   |
|                                        | <b>Vitamin C+E</b>    |                 | <b>&lt;152 mg/day</b>           |              |                 | <b>≥152 mg/day</b>              |                                                   |
| <2.3 mg/day                            | 54                    | 56              | Ref.                            | 45           | 49              | 0.72 (0.39, 1.32)               | 0.64                                              |
| ≥2.3-4.7 mg/day                        | 43                    | 51              | 0.96 (0.53, 1.74)               | 43           | 57              | 0.60 (0.33, 1.08)               |                                                   |
| >4.7 mg/day                            | 49                    | 47              | 1.00 (0.52, 1.93)               | 53           | 49              | 0.94 (0.50, 1.78)               |                                                   |
|                                        | <b>Folate</b>         |                 | <b>&lt;276 µg/day</b>           |              |                 | <b>≥276 µg/day</b>              |                                                   |
| <2.3 mg/day                            | 47                    | 59              | Ref.                            | 52           | 46              | 1.08 (0.58, 1.99)               | 0.81                                              |
| ≥2.3-4.7 mg/day                        | 38                    | 53              | 0.94 (0.51, 1.72)               | 48           | 55              | 0.78 (0.43, 1.44)               |                                                   |
| >4.7 mg/day                            | 43                    | 43              | 1.17 (0.59, 2.32)               | 59           | 53              | 1.02 (0.54, 1.95)               |                                                   |
|                                        | <b>Red meat</b>       |                 | <b>&lt;25 g/day</b>             |              |                 | <b>≥25 g/day</b>                |                                                   |
| <2.3 mg/day                            | 44                    | 46              | Ref.                            | 54           | 59              | 0.97 (0.53, 1.75)               | 0.64                                              |
| ≥2.3-4.7 mg/day                        | 39                    | 54              | 0.75 (0.40, 1.42)               | 46           | 54              | 0.85 (0.46, 1.59)               |                                                   |
| >4.7 mg/day                            | 46                    | 55              | 0.85 (0.44, 1.66)               | 56           | 41              | 1.23 (0.61, 2.45)               |                                                   |
|                                        | <b>Processed meat</b> |                 | <b>&lt;14 g/day</b>             |              |                 | <b>≥14 g/day</b>                |                                                   |
| <2.3 mg/day                            | 49                    | 52              | Ref.                            | 50           | 53              | 0.82 (0.45, 1.49)               | 0.05                                              |
| ≥2.3-4.7 mg/day                        | 49                    | 51              | 0.98 (0.54, 1.77)               | 37           | 57              | 0.57 (0.30, 1.06)               |                                                   |
| >4.7 mg/day                            | 39                    | 52              | 1.28 (0.39, 1.41)               | 63           | 44              | 1.22 (0.62, 2.41)               |                                                   |
|                                        | <b>Smoking</b>        |                 | <b>No</b>                       |              |                 | <b>Yes</b>                      |                                                   |
| <2.3 mg/day                            | 37                    | 44              | Ref.                            | 74           | 72              | 1.37 (0.77, 2.45)               | 0.74                                              |
| ≥2.3-4.7 mg/day                        | 35                    | 47              | 0.96 (0.50, 1.86)               | 63           | 68              | 1.19 (0.65, 2.17)               |                                                   |
| >4.7 mg/day                            | 52                    | 45              | 1.29 (0.65, 2.56)               | 70           | 70              | 1.31 (0.69, 2.49)               |                                                   |

<sup>a</sup> Only women with complete information on dietary covariables (N=596) and smoking (N=677) were analyzed. <sup>b</sup> Adjusted for: study area, age, education, body mass index, family history of breast cancer, age at first birth, and energy intake. \**p*-value for overall interaction calculated by comparing the multivariate models with and without the interaction term using a likelihood ratio test

**Table S4. Waterborne ingested nitrate and breast cancer association (OR and 95%CI) stratified by other covariables among pre and postmenopausal women**

| <b>Waterborne ingested nitrate</b>    | <b>Cases</b> | <b>Controls</b> | <b>OR <sup>a</sup> (95% CI)</b> | <b>Cases</b> | <b>Controls</b> | <b>OR <sup>a</sup> (95% CI)</b>      |
|---------------------------------------|--------------|-----------------|---------------------------------|--------------|-----------------|--------------------------------------|
| <b>Histological type</b>              |              |                 | <b>Ductal <sup>b</sup></b>      |              |                 | <b>Others/undefined <sup>c</sup></b> |
| <2.6 mg/day                           | 332          | 507             | Ref.                            | 91           | 507             | Ref.                                 |
| ≥2.6-6.0 mg/day                       | 289          | 507             | 0.93 (0.75, 1.16)               | 112          | 507             | 1.16 (0.84, 1.60)                    |
| >6.0 mg/day                           | 330          | 506             | 1.16 (0.88, 1.52)               | 91           | 506             | 1.06 (0.70, 1.61)                    |
| <b>Estrogen receptor <sup>d</sup></b> |              |                 | <b>Negative</b>                 |              |                 | <b>Positive</b>                      |
| <2.6 mg/day                           | 73           | 507             | Ref.                            | 333          | 507             | Ref.                                 |
| ≥2.6-6.0 mg/day                       | 68           | 507             | 0.93 (0.64, 1.34)               | 321          | 507             | 1.02 (0.83, 1.26)                    |
| >6.0 mg/day                           | 77           | 506             | 1.01 (0.63, 1.61)               | 336          | 506             | 1.16 (0.89, 1.52)                    |

<sup>a</sup> Adjusted for: study area, age, education, body mass index, family history of breast cancer, age at first birth, use of oral contraceptives and energy intake. <sup>b</sup> ICD-10 code: C50. <sup>c</sup> ICD-10 codes: D05.1 and D05.7. <sup>d</sup> Numbers do not add 2765 due to missing data (N=37).

**Table S5. Breast cancer association (OR and 95%CI) with dietary ingested nitrate (mg/day) from different sources by menopausal status**

|                              |       | Postmenopausal <sup>a</sup> |                   |                |       | Premenopausal <sup>a</sup> |                   |
|------------------------------|-------|-----------------------------|-------------------|----------------|-------|----------------------------|-------------------|
| Nitrate intake sources       | Cases | Controls                    | OR (95%CI)        | Nitrate intake | Cases | Controls                   | OR (95%CI)        |
| <b>Animal</b>                |       |                             |                   |                |       |                            |                   |
| <3.8 mg/day                  | 228   | 344                         | Ref. <sup>b</sup> | <4.4 mg/day    | 73    | 103                        | Ref. <sup>c</sup> |
| 3.8-5.8mg/day                | 266   | 344                         | 0.98 (0.76, 1.27) | 4.4-6.4mg/day  | 108   | 104                        | 1.38 (0.89, 2.13) |
| > 5.8mg/day                  | 303   | 343                         | 1.03 (0.78, 1.35) | > 6.4mg/day    | 106   | 102                        | 1.10 (0.68, 1.76) |
| <b>Vegetables</b>            |       |                             |                   |                |       |                            |                   |
| <80mg/day                    | 284   | 344                         | Ref. <sup>b</sup> | <63mg/day      | 91    | 103                        | Ref. <sup>c</sup> |
| 80-127 mg/day                | 269   | 344                         | 0.91 (0.72, 1.16) | 63-106 mg/day  | 93    | 104                        | 0.88 (0.58, 1.35) |
| >127mg/day                   | 244   | 343                         | 0.81 (0.63, 1.05) | >106mg/day     | 103   | 102                        | 0.89 (0.58, 1.37) |
| <b>Total diet</b>            |       |                             |                   |                |       |                            |                   |
| <94mg/day                    | 281   | 344                         | Ref. <sup>b</sup> | <76 mg/day     | 92    | 103                        | Ref. <sup>c</sup> |
| 94-143 mg/day                | 263   | 344                         | 0.90 (0.71, 1.15) | 76-118 mg/day  | 88    | 104                        | 0.83 (0.54, 1.27) |
| >143mg/day                   | 253   | 343                         | 0.84 (0.64, 1.08) | >118 mg/day    | 107   | 102                        | 0.91 (0.59, 1.40) |
| <b>Total diet+waterborne</b> |       |                             |                   |                |       |                            |                   |
| <100mg/day                   | 293   | 344                         | Ref. <sup>b</sup> | <81 mg/day     | 125   | 136                        | Ref. <sup>c</sup> |
| 100-150 mg/day               | 255   | 344                         | 0.81 (0.63, 1.03) | 81-122 mg/day  | 86    | 100                        | 0.94 (0.62, 1.44) |
| >150mg/day                   | 249   | 343                         | 0.79 (0.61, 1.03) | >122 mg/day    | 76    | 73                         | 1.00 (0.65, 1.55) |

<sup>a</sup> Only women with available data from the food frequency questionnaire were analyzed. <sup>b</sup> Adjusted for: study area, age, education, body mass index, family history of breast cancer, age at first birth, oral contraceptives use, age at menopause and energy intake. <sup>c</sup> Adjusted for the same covariates than OR for postmenopausal women, excluding age at menopause.

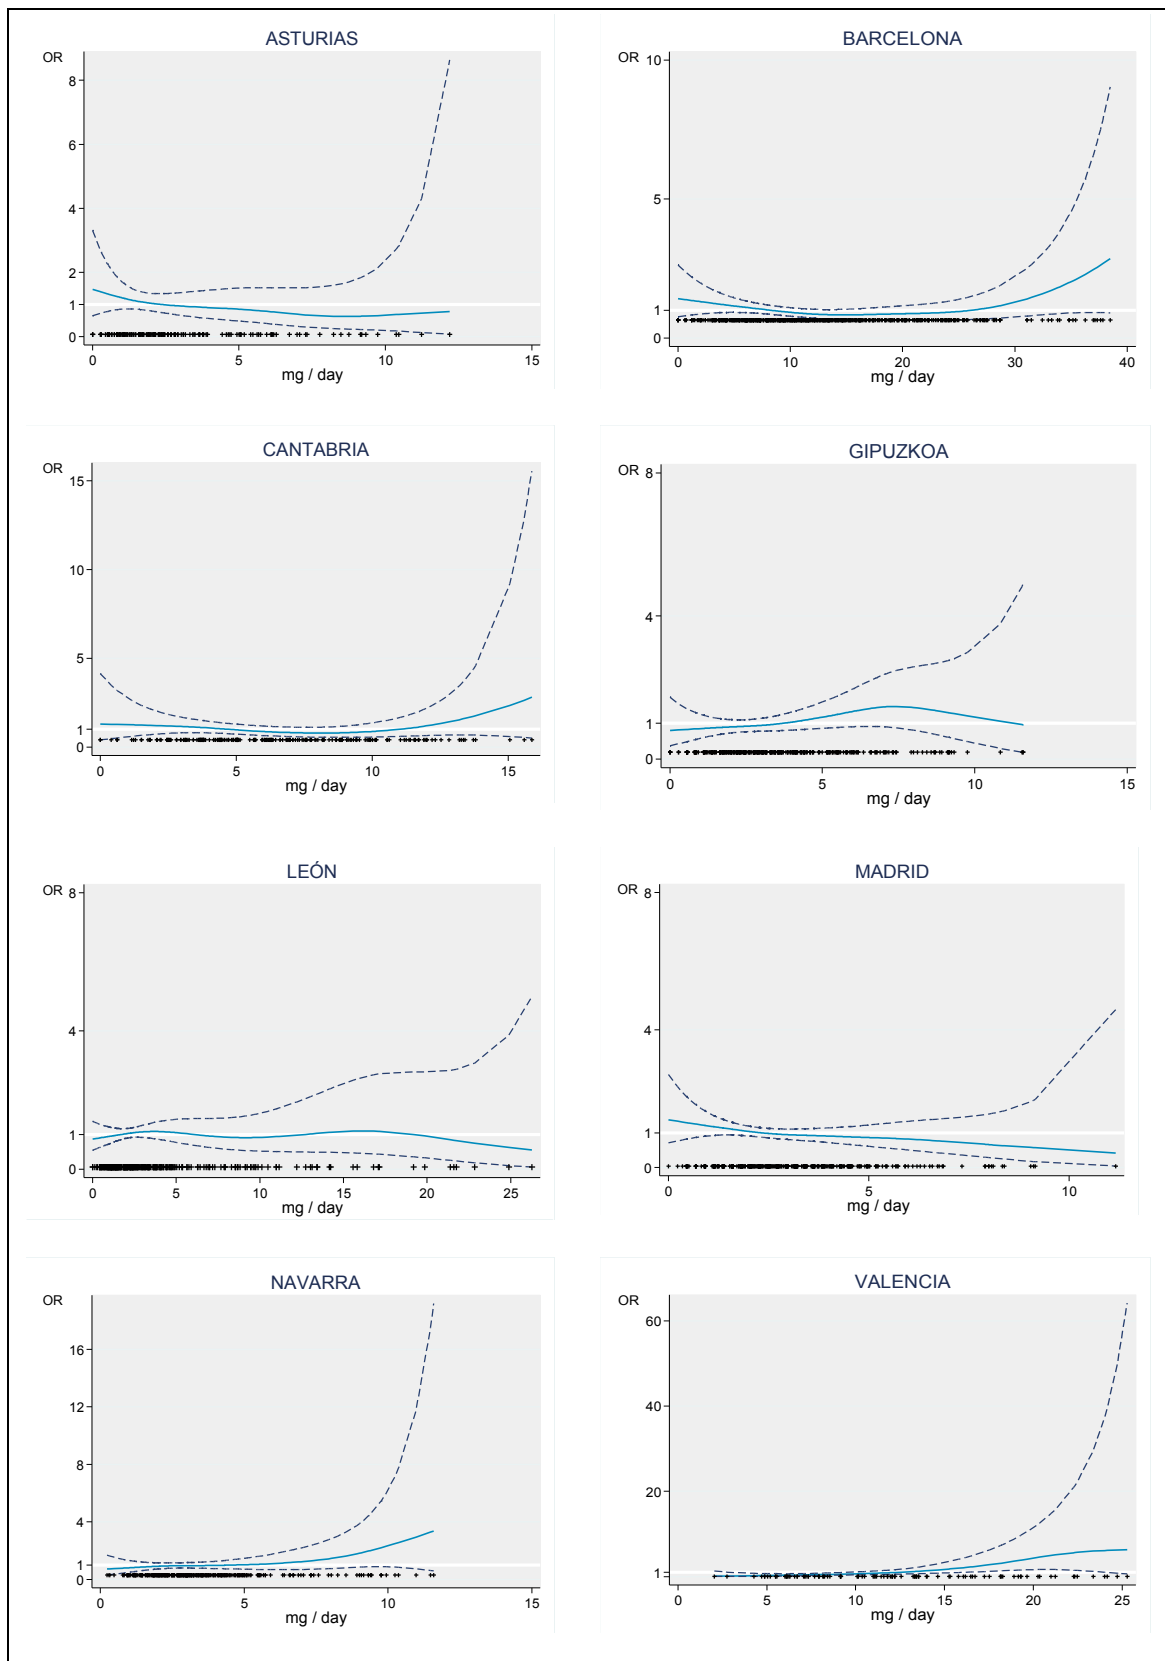

**Figure S1.** Exposure-response relationship between waterborne nitrate intake (mg/day) from age 18 to 2 years before interview and breast cancer. Generalized additive models (GAMs) by study area. Adjusted for: study area, age, education, body mass index, family history of breast cancer, age at first birth, use of oral contraceptives and energy intake.
